# Supplementary material for: SGLT2 Inhibitors in Management of Severe Hypomagnesemia in Patients Without Diabetes: A Report of 4 Cases
Source: PubMed Central journal article supplement — Kidney Med. 2023 Jul 1;5(9):100697. doi: 10.1016/j.xkme.2023.100697 (PMC10432792; doi:10.1016/j.xkme.2023.100697), 2023-07-01
Supplement: mmc1.pdf [file mmc1.pdf]

Table S1. Medications pre- and post-SGLT2 inhibitor use.

|                                    | <b>Case 1</b>                                                                                                                                                                                 | <b>Case 2</b>                                                                                                                               | <b>Case 3</b>                                                                                                                                                     | <b>Case 4</b>                                                                                                                                  |
|------------------------------------|-----------------------------------------------------------------------------------------------------------------------------------------------------------------------------------------------|---------------------------------------------------------------------------------------------------------------------------------------------|-------------------------------------------------------------------------------------------------------------------------------------------------------------------|------------------------------------------------------------------------------------------------------------------------------------------------|
| Medications (Pre-SGLT2 inhibitor)  | Amlodipine, aspirin, atorvastatin, carvedilol, ferrous sulfate, levothyroxine, losartan, Mag-tab SR, melatonin, mirtazapine, mycophenolate mofetil, sulfamethoxazole-trimethoprim, tacrolimus | Amlodipine, apixaban, fiber, levothyroxine, losartan, magnesium gluconate, sodium chloride, tolterodine tartrate, ergocalciferol, amiloride | Afatinib, sodium chloride, folic acid, midodrine, famotidine, amiloride, magnesium oxide, levothyroxine                                                           | Magnesium extended release, eplerenone, baclofen, calcium citrate/Vitamin D, Biotin, multivitamin, gabapentin, fexofenadine, albuterol inhaler |
| Medications (Post-SGLT2 inhibitor) | Amlodipine, aspirin, atorvastatin, carvedilol, ferrous sulfate, levothyroxine, losartan, melatonin, mirtazapine, mycophenolate mofetil, sulfamethoxazole-trimethoprim, tacrolimus             | Amlodipine, apixaban, fiber, levothyroxine, losartan, magnesium gluconate, sodium chloride, tolterodine tartrate, ergocalciferol, amiloride | Afatinib, sodium chloride, folic acid, midodrine, famotidine, amiloride, magnesium oxide, levothyroxine, oxycodone, apixaban, fludrocortisone, sodium bicarbonate | Magnesium extended release, eplerenone, baclofen, calcium citrate/Vitamin D, Biotin, multivitamin, gabapentin, fexofenadine, albuterol inhaler |

SGLT2, Sodium-glucose cotransporter-2
